# Supplementary material for: Evaluation of the reflectivity calibration of W-band radars based on observations in rain
Source: Copernicus journal article supplement (doi:10.5194/amt-13-5799-2020), 2020-11-03
Supplement: Supplementary file 1 [file amt-13-5799-2020-supplement.zip]

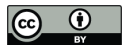

## *Supplement of*

# **Evaluation of the reflectivity calibration of W-band radars based on observations in rain**

**Alexander Myagkov et al.**

*Correspondence to:* Alexander Myagkov ([alexander.myagkov@radiometer-physics.de](mailto:alexander.myagkov@radiometer-physics.de))

- amt-13-5799-2020-supplement-title-page.pdf
- Case1.txt
- Case10.txt
- Case11.txt
- Case12.txt
- Case2.txt
- Case3.txt
- Case4.txt
- Case5.txt
- Case6.txt
- Case7.txt
- Case8.txt
- Case9.txt
- case10P.pdf
- case10T.pdf
- case11P.pdf
- case11T.pdf
- case12P.pdf
- case12T.pdf
- case1P.pdf

- case1T.pdf
- case2P.pdf
- case2T.pdf
- case3P.pdf
- case3T.pdf
- case4P.pdf
- case4T.pdf
- case5P.pdf
- case5T.pdf
- case6P.pdf
- case6T.pdf
- case7P.pdf
- case7T.pdf
- case8P.pdf
- case8T.pdf
- case9P.pdf
- case9T.pdf
- equation\_1.m
- equation\_2.m
- equation\_3.m
- equation\_A6.m

The copyright of individual parts of the supplement might differ from the CC BY 4.0 License.
